# Supplementary material for: Efficient inverted perovskite solar cells with truxene-bridged PDI trimers as electron transporting materials
Source: Royal Society of Chemistry journal article supplement (doi:10.1039/c9qm00329k), 2019-01-01
Supplement: c9qm00329k1.pdf [file c9qm00329k1.pdf]

## **Efficient inverted perovskite solar cells with truxene-bridged PDI trimers as electron transporting materials**

Rui Wang,<sup>a†</sup> Kui Jiang,<sup>b†</sup> Fei Wu,<sup>\*a</sup> Linna Zhu<sup>\*a</sup> and He Yan<sup>\*b</sup>

*Chongqing Key Laboratory for Advanced Materials and Technologies of Clean Energy, Faculty of Materials & Energy, Southwest University, Chongqing 400715, P.R. China.*

*E-mail: lnzhu@swu.edu.cn; feiwu610@swu.edu.cn; hyan@ust.hk*

### **Experimental section**

#### **Materials and instruments**

Unless otherwise stated, all starting materials were purchased from commercial suppliers (Sigma-Aldrich and Energy Chemical) and used without further purification, including P3CT (Rieke Metals), PbI<sub>2</sub> (p-OLED, >99.99 %), MAI (p-OLED, ≥99.5 %), PCBM (p-OLED, ≥99 %), C<sub>60</sub> (p-OLED), BCP (p-OLED), DMF (Sigma-Aldrich, 99.8 %), DMSO (Sigma-Aldrich, 99.8 %) and CB (Sigma-Aldrich, 99.8 %). UV/Vis absorption spectra were recorded on a Shimadzu UV-2450 absorption spectrophotometer. Fluorescence spectra were measured on a Hitachi F-4600 FL Spectrophotometer. The PL lifetimes were measured by a single photon counting spectrometer from Edinburgh Instruments (FLS920) with a Picosecond Pulsed UV-LASTER (LASTER377) as the excitation source. Field-emission SEM (FE-SEM) image was taken on JSM-7800F. Cyclic voltammetry (CV) was carried out in 0.1 M dichloromethane solution using TBAPF<sub>6</sub> as the electrolyte. The curves were recorded using the SCE as the reference electrode, and they were calibrated by the ferrocene-ferrocenium (Fc/Fc<sup>+</sup>) redox couple, with a scanning rate of 100 mV s<sup>-1</sup>. AFM images were collected in air on a Bruker AFM using a tapping mode.

#### **Device fabrication**

The devices were fabricated according to our previous work. The indium tin oxide (ITO) glass substrates were sequentially washed by sonication using detergent, deionized water, ethanol and acetone. The hole transporting layer P3CT-Na was formed on ITO substrates by spin coating at 4000 rpm for 60 s followed by annealing at 140°C for 30 min. Then the samples were transferred into a N<sub>2</sub>-filled glovebox. A CH<sub>3</sub>NH<sub>3</sub>PbI<sub>3</sub> precursor solution (1.4 M in DMF: DMSO mixed solution with a v/v of 4:1) was spin-coated in a two-step program at 400 and 5000 rpm for 3 and 30 s, respectively. During the second step, 200 μL of chlorobenzene was poured on the spinning substrate at 10 s after the start-up. Next, the as-spun perovskite layer was annealed on a hot plate at 60 °C for 1 min and at 80 °C for 2 min to drive off solvent and form the perovskite phase. Then Tr-PDI derivative in chlorobenzene were spin-coated (5000 rpm) onto the perovskite layer. To fabricate ITO/P3CT-Na/Perovskite/ETL/BCP/Ag device, 6 nm thick BCP was then thermally evaporated, and an approximately 100 nm thick Ag counter electrode was deposited on top to finish the device fabrication. To fabricate ITO/P3CT-Na/Perovskite/Tr-PDI<sub>3</sub> or Tr-PDI<sub>3</sub>-C/C<sub>60</sub>/BCP/Ag device, C<sub>60</sub> (40 nm) and BCP (6 nm) were evaporated under high vacuum on top of the interlayer. Finally, a 100 nm thick Ag electrode was deposited through a shadow mask. The active area of our device is 0.09 cm<sup>2</sup>.

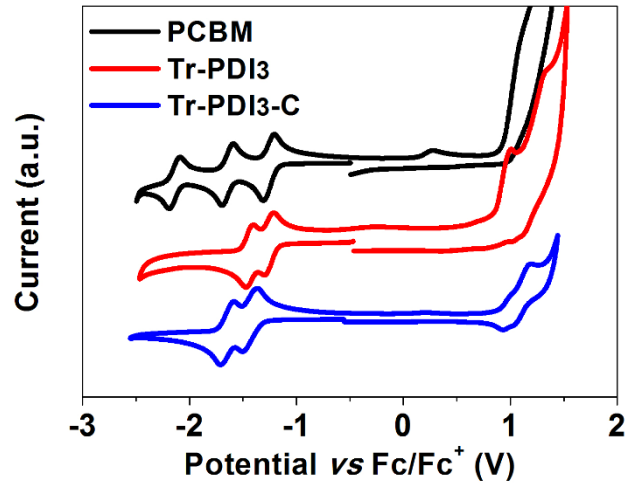

Figure S1. Cyclic voltammograms of PCBM, Tr-PDI<sub>3</sub> and Tr-PDI<sub>3</sub>-C.

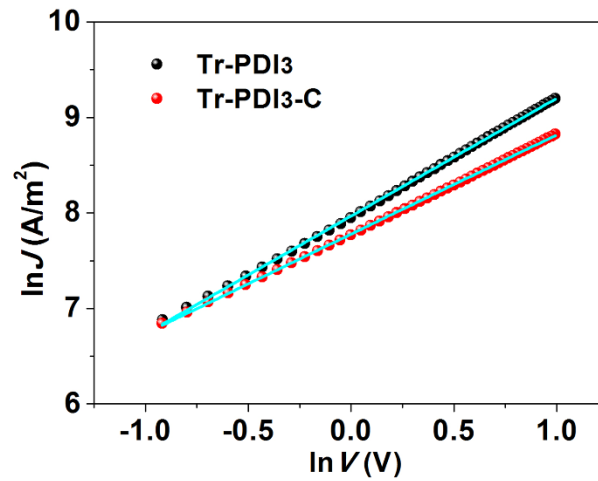

Figure S2. The current-voltage data of SCLC model based on the configuration of ITO/ZnO/Tr-PDI<sub>3</sub> or Tr-PDI<sub>3</sub>-C/BCP/Ag.

Table S1. The photovoltaic parameters of the device with Tr-PDI<sub>3</sub> ETL in different thicknesses.

| Tr-PDI <sub>3</sub> | $V_{oc}$ (mV) | $J_{sc}$ (mA cm <sup>-2</sup> ) | FF   | PCE (%) |
|---------------------|---------------|---------------------------------|------|---------|
| 48 nm               | 1041          | 20.90                           | 0.71 | 15.51   |
| 31 nm               | 1032          | 21.47                           | 0.79 | 17.45   |
| 23 nm               | 1035          | 21.07                           | 0.77 | 16.77   |
| 17 nm               | 1033          | 20.83                           | 0.66 | 14.27   |

Table S2. The photovoltaic parameters of the device with Tr-PDI<sub>3</sub>-C ETL in different thicknesses.

| Tr-PDI <sub>3</sub> -C | V <sub>OC</sub> (mV) | J <sub>SC</sub> (mA cm <sup>-2</sup> ) | FF   | PCE (%) |
|------------------------|----------------------|----------------------------------------|------|---------|
| 46 nm                  | 1049                 | 20.03                                  | 0.64 | 13.48   |
| 33 nm                  | 1050                 | 20.52                                  | 0.75 | 16.09   |
| 25 nm                  | 1047                 | 20.92                                  | 0.77 | 16.90   |
| 16 nm                  | 1041                 | 20.35                                  | 0.71 | 15.10   |

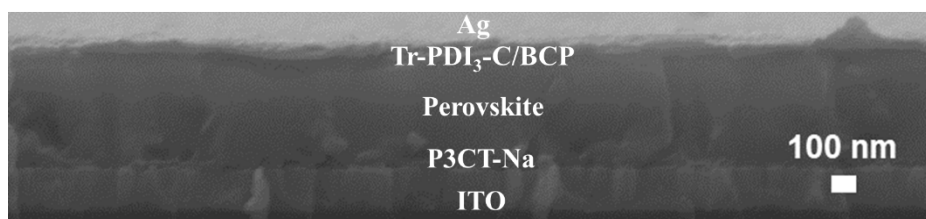

Figure S3. Cross-sectional SEM image of inverted PSCs.

Table S3. Photovoltaic parameters of the inverted devices with Tr-PDI<sub>3</sub> or Tr-PDI<sub>3</sub>-C ETL under forward and reverse scan directions, respectively.

| ETLs                       | Scan direction | V <sub>OC</sub> (mV) | J <sub>SC</sub> (mA cm <sup>-2</sup> ) | FF   | PCE (%) |
|----------------------------|----------------|----------------------|----------------------------------------|------|---------|
| Tr-PDI <sub>3</sub> /BCP   | forward        | 1030                 | 21.39                                  | 0.78 | 17.27   |
|                            | reverse        | 1032                 | 21.47                                  | 0.79 | 17.45   |
| Tr-PDI <sub>3</sub> -C/BCP | forward        | 1045                 | 20.92                                  | 0.76 | 16.66   |
|                            | reverse        | 1047                 | 20.92                                  | 0.77 | 16.90   |

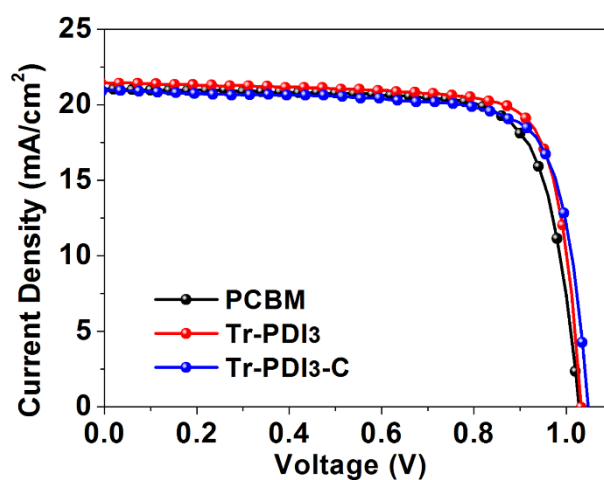

Figure S4. *J-V* curves of PSCs based on PC<sub>61</sub>BM, Tr-PDI<sub>3</sub> and Tr-PDI<sub>3</sub>-C as the ETL, respectively.

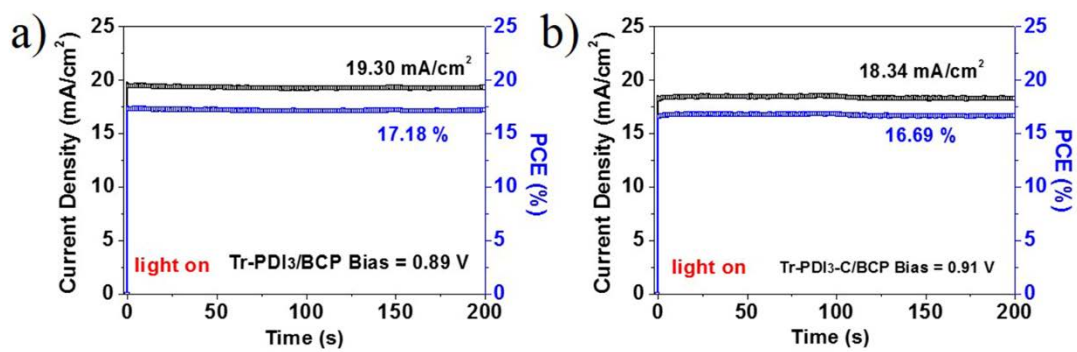

Figure S5. Steady-state  $J_{SC}$  and efficiency output of devices using (a) Tr-PDI<sub>3</sub> and (b) Tr-PDI<sub>3</sub>-C as the ETL, respectively.

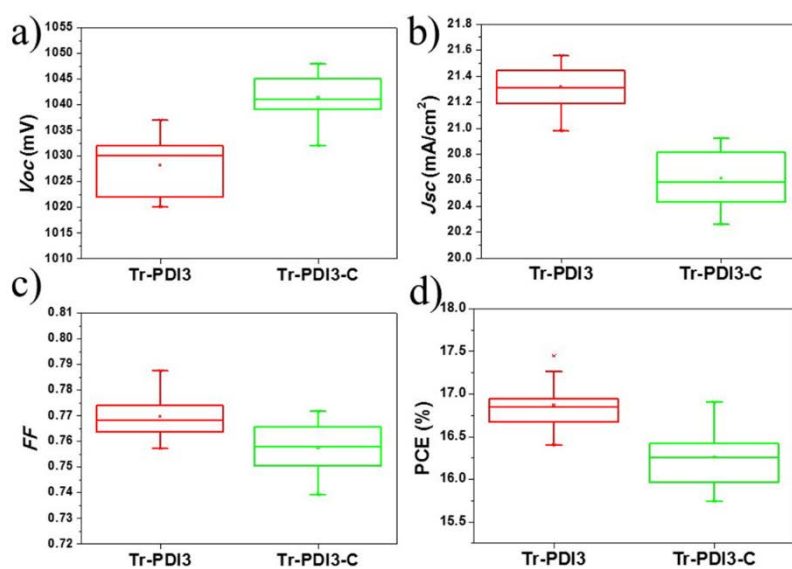

Figure S6. Statistics of photovoltaic parameters (a)  $V_{OC}$ , (b)  $J_{SC}$ , (c) FF, and (d) PCE of 20 PSCs containing Tr-PDI<sub>3</sub> or Tr-PDI<sub>3</sub>-C ETL measured under AM 1.5 G illumination ( $100 \text{ mW cm}^{-2}$ ).

Table S4. Photovoltaic parameters of the inverted devices with Tr-PDI<sub>3</sub> and Tr-PDI<sub>3</sub>-C interlayer under forward and reverse scan directions, respectively.

| ETLs                                            | Scan direction | $V_{OC}$ (mV) | $J_{SC}$ (mA cm <sup>-2</sup> ) | FF   | PCE (%) |
|-------------------------------------------------|----------------|---------------|---------------------------------|------|---------|
| Tr-PDI <sub>3</sub> /C <sub>60</sub> /BCP       | forward        | 1078          | 22.21                           | 0.82 | 19.68   |
|                                                 | reverse        | 1081          | 22.22                           | 0.83 | 19.83   |
| Tr-PDI <sub>3</sub> -C/<br>C <sub>60</sub> /BCP | forward        | 1083          | 21.98                           | 0.80 | 19.14   |
|                                                 | reverse        | 1086          | 21.97                           | 0.81 | 19.24   |

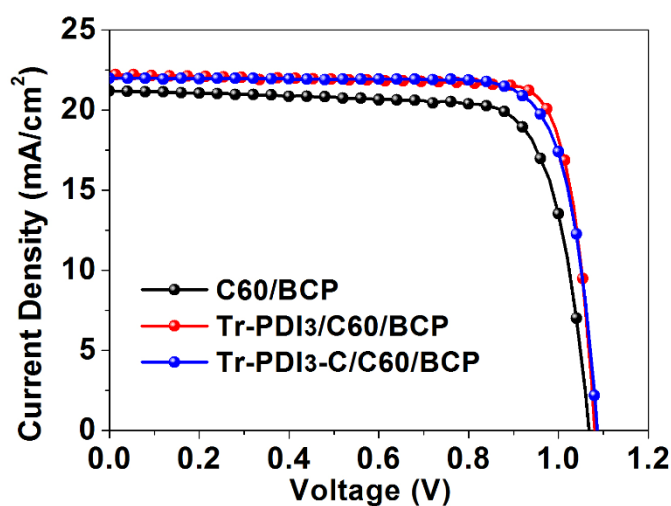

Figure S7.  $J$ - $V$  curves of PSCs based on Tr-PDI<sub>3</sub> or Tr-PDI<sub>3</sub>-C interlayer and compared with the control device.

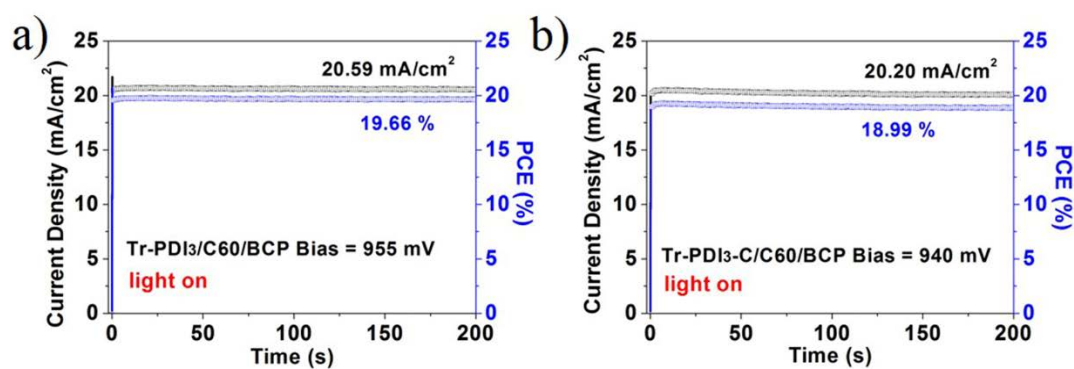

Figure S8. Steady-state  $J_{SC}$  and efficiency output of the device with (a) Tr-PDI<sub>3</sub> and (b) Tr-PDI<sub>3</sub>-C interlayer, respectively.

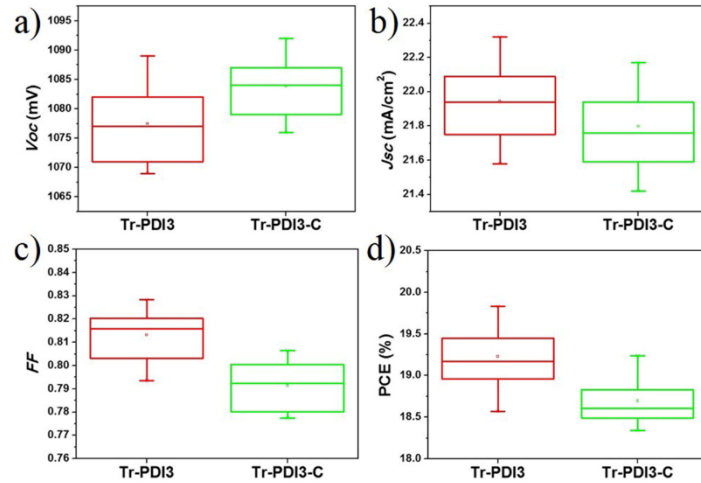

Figure S9. Statistics of photovoltaic parameters (a)  $V_{oc}$ , (b)  $J_{sc}$ , (c) FF, and (d) PCE of 20 PSCs containing Tr-PDI<sub>3</sub> or Tr-PDI<sub>3</sub>-C interlayer measured under AM 1.5 G illumination ( $100 \text{ mW cm}^{-2}$ ).

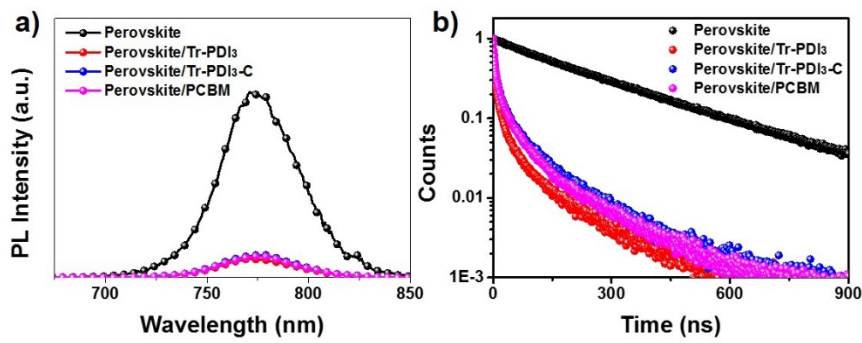

Figure S10. (a) Steady-state and (b) time-resolved PL spectra of neat perovskite, perovskite/PCBM, perovskite/Tr-PDI<sub>3</sub> and perovskite/Tr-PDI<sub>3</sub>-C films, respectively.
